# Supplementary material for: Chinese striped-neck turtles vocalize underwater and show differences in peak frequency among different age and sex groups
Source: PeerJ. 2023 Jan 13;11:e14628. doi: 10.7717/peerj.14628 (PMC9841902; doi:10.7717/peerj.14628)
Supplement: Data S1 [file peerj-11-14628-s001.xlsx]

## Sheet: Sheet1
group	Low-Frequency	High-Frequency	Duration	Peak-Frequency	Call Type
Female adult	7122	7373	0.013	7278	B
Female adult	7023	7163	0.064	7084	A
Female adult	4907	5719	0.306	5146	E
Female adult	4982	6621	0.28	5233	E
Female adult	5163	5334	0.229	5254	E
Female adult	1093	1255	0.025	1184	D
Female adult	4176	6104	0.153	4651	E
Female adult	4562	4869	0.115	4716	E
Female adult	5123	5614	0.242	5469	E
Female adult	4959	5322	0.102	5146	E
Female adult	5059	5359	0.229	5190	E
Female adult	5122	5413	0.331	5190	E
Female adult	5311	5621	0.217	5513	E
Female adult	5140	6975	0.229	5254	E
Female adult	5070	6963	0.166	5211	E
Female adult	5427	5567	0.076	5491	A
Female adult	5111	6468	0.089	5233	E
Female adult	6307	6661	0.0238	6482	A
Female adult	6445	6668	0.025	6546	A
Female adult	6480	6696	0.051	6589	A
Female adult	5032	5344	0.096	5211	E
Female adult	5079	5377	0.218	5254	E
Female adult	271	386	0.2857	323	C
Female adult	257	391	0.1274	323	C
Female adult	618	758	0.314	668	C
Female adult	635	758	0.4914	689	C
Female adult	710	848	0.2321	818	C
Female adult	771	938	0.1365	861	C
Female adult	235	371	0.3822	302	C
Female adult	4974	5357	0.3276	5146	E
Female adult	7685	8356	0.4641	8204	E
Female adult	4703	5010	0.1911	4823	A
Female adult	1011	1172	0.0273	1098	D
Female adult	1020	1193	0.0683	1098	D
Female adult	4967	5328	0.0819	5233	A
Female adult	5119	5365	0.4368	5254	E
Female adult	5146	5392	0.3822	5276	E
Female adult	8758	9712	0.0137	9238	B
Female adult	951	1195	0.0637	1077	D
Female adult	925	1169	0.1784	1034	D
Female adult	563	709	0.1147	646	C
Female adult	582	691	0.2931	646	C
Female adult	545	691	0.102	646	C
Female adult	536	682	0.4588	581	C
Female adult	845	1245	0.0892	1055	F
Female adult	945	1208	0.0892	1034	F
Female adult	900	1218	0.0765	1034	F
Female adult	645	758	0.2549	689	C
Female adult	977	1105	0.1529	1055	F
Female adult	990	1226	0.2421	1163	F
Female adult	977	1144	0.1274	1034	F
Female adult	1015	1132	0.0255	1077	D
Female adult	4228	4986	0.0255	4651	B
Female adult	1028	1157	0.0255	1098	D
Female adult	1041	1144	0.0127	1098	D
Female adult	4428	4658	0.2676	4587	E
Female adult	4530	4747	0.3823	4630	E
Female adult	12936	16956	0.0127	13975	B
Female adult	224	336	0.0892	280	D
Female adult	990	1106	0.0382	1055	D
Female adult	1006	1157	0.1045	1120	D
Female adult	530	655	0.9694	603	C
Female adult	522	655	0.8707	603	C
Female adult	939	1079	0.3251	1034	C
Female adult	624	768	0.2206	689	C
Female adult	989	1118	0.1335	1034	C
Female adult	507	1158	0.1393	603	G
Female adult	5181	5412	0.3889	5254	E
Female adult	613	732	0.1365	668	C
Female adult	647	737	0.0546	711	D
Female adult	972	1131	0.0546	1034	D
Female adult	435	594	0.2867	538	G
Female adult	433	550	0.0819	495	G
Female adult	435	558	0.0683	474	G
Female adult	1094	1232	0.0546	1163	D
Female adult	969	1076	0.4505	1034	C
Female adult	2136	2279	0.1229	2196	D
Female adult	643	752	0.0956	689	D
Female adult	179	582	0.1638	495	C
Female adult	13745	14007	0.1092	13889	A
Female adult	440	1024	0.7098	495	C
Female adult	769	919	0.041	840	D
Female adult	13073	13516	0.051	13157	B
Female adult	1033	1957	0.0765	1098	G
Female adult	449	557	0.1784	517	C
Female adult	450	565	0.1274	517	C
Female adult	938	1093	0.0127	1034	D
Female adult	1314	1452	0.051	1400	D
Female adult	983	1149	0.0637	1077	D
Female adult	934	1103	0.0127	1034	D
Female adult	925	1079	0.0255	1012	D
Female adult	630	745	0.0382	689	D
Female adult	893	1054	0.0255	948	D
Female adult	604	745	0.051	689	D
Female adult	494	604	0.0382	538	D
Female adult	912	1037	0.019	969	D
Female adult	387	530	0.0637	474	D
Female adult	681	786	0.0637	732	D
Female adult	1007	1182	0.027	1098	D
Female adult	977	1092	0.0255	1034	D
Female adult	989	1123	0.0127	1077	D
Female adult	789	934	0.0382	861	D
Female adult	514	630	0.0382	581	D
Female adult	553	720	0.0255	646	D
Female adult	900	1092	0.0127	969	D
Female adult	517	643	0.0637	581	D
Female adult	739	912	0.0255	840	D
Female adult	707	900	0.0127	797	D
Female adult	776	907	0.0127	861	D
Female adult	934	1053	0.0127	1012	D
Female adult	514	655	0.0382	581	D
Female adult	689	861	0.0127	754	D
Female adult	565	717	0.0255	668	D
Female adult	906	1034	0.0255	991	D
Female adult	554	663	0.0255	625	D
Female adult	527	668	0.0382	603	D
Female adult	634	761	0.0255	689	D
Female adult	700	841	0.0255	775	D
Female adult	617	745	0.0127	711	D
Female adult	1039	1173	0.0255	1098	D
Female adult	950	1095	0.0255	1034	D
Female adult	661	797	0.0255	732	D
Female adult	706	834	0.0127	775	D
Female adult	501	622	0.0255	581	D
Female adult	934	1056	0.0255	1012	D
Female adult	645	810	0.0255	732	D
Female adult	567	694	0.0255	625	D
Female adult	984	1105	0.0382	1034	D
Female adult	956	1105	0.0127	1012	D
Female adult	797	925	0.0255	883	D
Female adult	645	797	0.0127	732	D
Female adult	956	1118	0.0255	1034	D
Female adult	4266	4488	0.0765	4393	E
Female adult	5037	5243	0.2421	5211	E
Female adult	728	845	0.0382	797	D
Female adult	522	645	0.0382	581	D
Female adult	767	917	0.0255	840	D
Female adult	926	1109	0.0137	1012	D
Female adult	990	1145	0.0273	1077	D
Female adult	909	1054	0.041	991	D
Female adult	635	729	0.041	689	D
Female adult	572	736	0.0273	646	D
Female adult	927	1081	0.0137	991	D
Female adult	936	1035	0.0273	991	D
Female adult	657	736	0.041	689	D
Female adult	954	1053	0.0273	991	D
Female adult	644	772	0.0273	689	D
Female adult	833	945	0.0546	883	D
Female adult	981	1107	0.0273	1055	D
Female adult	1009	1143	0.0273	1098	D
Female adult	909	1045	0.0137	991	D
Female adult	1004	1181	0.0137	1163	D
Female adult	972	1090	0.041	1012	D
Female adult	654	809	0.0137	754	D
Female adult	716	846	0.0137	775	D
Female adult	1049	1172	0.0137	1098	D
Female adult	1245	1377	0.0273	1335	D
Female adult	554	716	0.3686	603	C
Female adult	245	373	0.2184	323	C
Female adult	645	738	0.041	711	D
Female adult	627	827	0.0137	732	D
Female adult	482	603	0.2457	538	C
Female adult	972	1094	0.0137	1055	D
Female adult	936	1058	0.0273	991	D
Female adult	477	603	1.0784	560	C
Female adult	896	1062	0.0273	991	D
Female adult	968	1071	0.0137	1034	D
Female adult	900	1035	0.0273	969	D
Female adult	563	666	0.041	646	D
Female adult	590	682	0.0273	646	D
Female adult	527	709	0.0546	625	D
Female adult	227	318	0.2457	237	C
Female adult	477	576	0.546	538	C
Female adult	554	635	0.4368	603	C
Female adult	954	1098	0.033	1012	D
Female adult	13777	14308	0.0137	14061	B
Female adult	446	578	0.1429	517	C
Female adult	4239	4506	0.0714	4285	A
Female adult	445	565	0.0714	495	D
Female adult	472	595	0.2024	538	C
Female adult	971	1182	0.2143	1077	F
Female adult	167	771	0.1667	237	G
Female adult	3763	3893	0.0476	3854	B
Female adult	130	1246	0.131	172	G
Female adult	4247	4404	0.0595	4328	A
Female adult	4251	4377	0.0714	4307	A
Female adult	4227	4395	0.039	4328	B
Female adult	588	6909	0.5	5017	E
Female adult	609	6909	0.381	1077	E
Female adult	462	564	0.0595	517	D
Female adult	157	1208	0.0952	215	G
Female adult	925	1221	0.0476	1055	D
Female adult	988	1144	0.0595	1055	D
Female adult	5435	5609	0.1667	5513	E
Female adult	5442	5647	0.2262	5556	E
Female adult	5429	5635	0.2143	5534	E
Female adult	3994	4097	0.0476	4070	A
Female adult	167	308	0.1786	215	C
Female adult	4239	4383	0.0952	4307	B
Female adult	963	1097	0.0357	1034	D
Female adult	595	709	0.1071	668	C
Female adult	954	1067	0.0714	1012	D
Female adult	308	388	0.1667	323	C
Female adult	964	1137	0.0714	1055	D
Female adult	1044	1164	0.0952	1141	D
Female adult	636	736	0.0833	689	D
Female adult	174	308	0.1786	237	C
Female adult	318	401	0.0833	366	C
Female adult	923	1552	0.3571	1486	E
Female adult	749	1565	0.3571	1421	E
Female adult	12988	14208	0.1229	13135	B
Female adult	549	645	0.2321	560	C
Female adult	475	591	0.4778	538	C
Female adult	3704	3905	0.0956	3854	A
Female adult	13753	13903	0.0273	13846	B
Female adult	13429	13827	0.0273	13609	B
Female adult	180	315	0.0546	280	D
Female adult	3921	4359	0.1229	3984	A
Female adult	629	732	1.5971	668	C
Female adult	3768	4073	0.1365	4027	A
Female adult	4393	4709	0.0956	4565	A
Female adult	5172	5443	0.0819	5297	A
Female adult	4356	4510	0.1638	4479	A
Female adult	977	1108	0.1775	1055	C
Female adult	951	1157	0.5051	1055	C
Female adult	461	631	0.2381	538	C
Female adult	3946	5064	0.25	4716	A
Female adult	14164	14383	0.0238	14233	B
Female adult	4097	4331	0.0476	4264	A
Female adult	3769	4300	0.0595	3984	A
Female adult	489	587	0.4762	538	C
Female adult	434	562	0.119	517	C
Female adult	198	464	1.0238	302	C
Female adult	281	618	0.3214	388	C
Female adult	970	1180	0.0119	1077	F
Female adult	4155	4771	0.119	4673	A
Female adult	995	1174	0.0714	1077	F
Female adult	14085	14378	0.0357	14212	B
Female adult	3662	3879	0.119	3811	A
Female adult	4185	4607	0.119	4522	A
Female adult	3750	3892	0.0595	3811	A
Female adult	357	485	0.1667	409	C
Female adult	13974	14378	0.0238	14061	B
Female adult	319	408	0.619	366	C
Female adult	12801	13541	0.0476	13092	B
Female adult	12864	13286	0.0238	13178	B
Female adult	549	664	0.1905	646	C
Female adult	255	408	0.131	345	G
Female adult	13375	13860	0.0476	13588	B
Female adult	944	1190	0.0595	1077	F
Female adult	813	918	0.0947	883	D
Female adult	827	951	0.0789	904	D
Female adult	1024	1241	0.0316	1077	F
Female adult	964	1182	0.0158	1098	F
Female adult	13371	13538	0.0158	13501	B
Female adult	14036	14273	0.0158	14104	B
Female adult	989	1241	0.1736	1055	F
Female adult	477	652	1.089	603	C
Female adult	568	694	0.1578	646	C
Female adult	785	964	0.0158	861	F
Female adult	1031	1169	0.0316	1098	F
Female adult	12424	13622	0.0631	13501	B
Female adult	1015	1157	0.0316	1077	F
Female adult	964	1182	0.0316	1120	F
Female adult	1105	1225	0.2367	1184	C
Female adult	4459	4690	0.3472	4608	E
Female adult	302	379	0.1736	345	C
Female adult	15747	17233	0.0473	17054	B
Female adult	5546	5800	0.1365	5685	A
Female adult	688	1600	0.0273	775	D
Female adult	3867	4212	0.0819	4113	A
Female adult	3565	3881	0.0956	3833	A
Female adult	3785	4841	0.1775	3984	A
Female adult	3894	4841	0.1502	4694	A
Female adult	3675	4052	0.0819	3941	A
Female adult	4155	4744	0.041	4307	A
Female adult	4232	4850	0.1365	4328	A
Female adult	3661	3841	0.0546	3790	A
Female adult	3555	5558	0.2867	3854	A
Female adult	981	1070	0.0683	1034	D
Female adult	4642	5654	0.2321	5556	A
Female adult	240	350	0.1911	302	C
Female adult	741	1616	0.6429	861	E
Female adult	439	547	0.1905	517	C
Female adult	458	562	0.1429	517	C
Female adult	5129	5591	0.3571	5276	E
Female adult	5888	6166	0.2262	6072	A
Female adult	4493	4758	0.0952	4651	A
Female adult	582	746	0.869	668	C
Female adult	1972	2113	0.0714	2067	D
Female adult	5428	5631	0.0476	5599	B
Female adult	9959	10302	0.119	10099	B
Female adult	842	7360	0.6429	1098	E
Female adult	813	1448	0.5476	1184	E
Female adult	916	1448	0.6786	1314	E
Female adult	729	1700	0.4881	1098	E
Female adult	677	1585	0.6429	1034	E
Female adult	609	726	0.8452	668	C
Female adult	4351	4985	0.1402	4823	A
Female adult	5095	5651	0.0127	5340	B
Female adult	4199	4803	0.1784	4673	E
Female adult	4486	5709	0.3441	4716	E
Female adult	4596	5603	0.3823	4673	E
Female adult	227	413	0.0382	345	D
Female adult	498	665	0.2549	581	C
Female adult	6026	7264	0.548	6374	E
Female adult	529	1601	0.5225	1206	E
Female adult	13547	13873	0.051	13781	A
Female adult	5179	5338	0.0382	5254	B
Female adult	5168	5452	0.1147	5233	E
Female adult	5135	5694	0.2039	5276	E
Female adult	4277	4440	0.102	4371	A
Female adult	482	604	0.0892	560	C
Female adult	204	760	0.1147	323	G
Female adult	648	5471	0.5735	904	E
Female adult	4591	5482	0.3568	5276	E
Female adult	544	6192	0.6244	1077	E
Female adult	4665	5256	0.2166	4867	E
Female adult	5392	6298	0.2294	5620	E
Female adult	5075	6494	0.3823	5663	E
Female adult	5059	5392	0.0892	5254	A
Female adult	4143	5630	0.1147	5577	A
Female adult	4637	5120	0.3059	4716	E
Female adult	5014	5573	0.7009	5513	E
Male adult	361	489	0.0546	452	D
Male adult	629	734	0.3959	668	C
Male adult	618	721	0.8327	668	C
Male adult	153	566	0.6825	237	C
Male adult	206	629	0.5597	280	C
Male adult	1739	2035	0.1638	1938	A
Male adult	449	575	0.1638	538	C
Male adult	6561	7215	0.0683	6697	A
Male adult	6441	7211	0.0956	6568	A
Male adult	162	296	0.1092	237	C
Male adult	198	611	0.4095	280	C
Male adult	224	331	0.4205	258	C
Male adult	235	523	0.3313	237	C
Male adult	7027	7198	0.0127	7106	B
Male adult	395	514	0.0892	474	C
Male adult	6863	7454	0.1274	7063	A
Male adult	180	342	0.0382	258	D
Male adult	514	720	0.2676	646	C
Male adult	420	574	0.0637	495	C
Male adult	394	574	0.0765	495	C
Male adult	591	725	0.7009	689	C
Male adult	274	540	0.3313	366	C
Male adult	600	720	0.6372	689	C
Male adult	1269	1722	0.1912	1357	A
Male adult	1073	1214	0.0833	1141	D
Male adult	1081	1188	0.1071	1120	D
Male adult	7566	7750	0.0119	7666	B
Male adult	619	727	0.4524	668	C
Male adult	425	651	0.0476	495	D
Male adult	438	567	0.0952	495	F
Male adult	1670	1869	0.25	1744	C
Male adult	7173	7707	0.25	7515	A
Male adult	1474	1614	0.0952	1550	D
Male adult	312	434	0.0714	388	D
Male adult	554	756	0.5595	689	C
Male adult	565	724	0.1905	668	C
Male adult	235	342	0.1274	258	C
Male adult	267	438	0.0637	345	D
Male adult	1630	1805	0.051	1744	D
Male adult	1373	1495	0.0255	1421	D
Male adult	1623	1748	0.1529	1723	C
Male adult	1509	1686	0.2421	1615	C
Male adult	919	1066	0.0127	991	D
Male adult	618	717	0.5352	668	C
Male adult	607	733	0.446	689	C
Male adult	2469	2600	0.0382	2541	D
Male adult	607	722	0.8283	668	C
Male adult	217	380	0.3186	280	C
Male adult	596	706	0.4588	646	C
Male adult	667	749	0.1657	711	C
Male adult	618	727	0.7646	668	C
Male adult	607	716	0.4078	668	C
Male adult	580	717	0.6244	668	C
Male adult	609	729	0.2676	668	C
Male adult	597	737	0.6882	668	C
Male adult	590	737	0.3823	668	C
Male adult	658	737	0.0892	711	C
Male adult	604	727	0.3441	668	C
Male adult	599	727	0.1657	668	C
Male adult	648	771	0.3059	732	C
Male adult	192	324	0.3951	302	C
Male adult	3179	3292	0.051	3230	A
Male adult	609	728	0.3276	668	C
Male adult	613	725	0.273	646	C
Male adult	441	644	0.1229	517	G
Male adult	613	706	0.7508	625	C
Male adult	617	728	0.3276	668	C
Male adult	265	375	0.4232	323	C
Male adult	587	712	0.3186	668	C
Male adult	605	712	0.6244	668	C
Male adult	596	712	0.7519	668	C
Male adult	605	712	0.4843	668	C
Male adult	596	721	0.446	668	C
Male adult	5567	5808	0.0382	5685	A
Male adult	621	724	0.3696	668	C
Male adult	126	220	0.3951	129	C
Male adult	568	736	0.2931	668	C
Male adult	589	705	0.2421	668	C
Male adult	600	726	0.1147	646	C
Male adult	592	715	0.1402	646	C
Male adult	598	705	0.7646	646	C
Male adult	585	711	0.497	646	C
Male adult	1526	1700	0.2676	1658	D
Male adult	1533	1662	0.1147	1615	D
Male adult	594	694	0.3568	646	C
Male adult	523	643	0.5352	581	C
Male adult	754	893	0.0382	861	D
Male adult	585	714	0.6882	668	C
Male adult	595	724	0.1274	668	C
Male adult	1076	1200	0.1657	1141	C
Male adult	595	695	0.3951	646	C
Male adult	787	907	0.1147	840	D
Male adult	411	1099	0.1147	495	D
Male adult	588	715	0.5735	668	C
Male adult	606	1558	0.0683	689	D
Male adult	416	563	0.4843	495	C
Male adult	588	710	0.3313	646	C
Male adult	601	697	0.102	646	C
Male adult	577	726	0.1912	646	C
Male adult	577	723	0.0765	646	C
Male adult	608	742	0.102	668	C
Male adult	1481	1680	0.041	1572	D
Male adult	6308	6724	0.1365	6460	A
Male adult	567	691	0.2867	646	C
Male adult	609	748	0.1911	668	C
Male adult	589	726	0.7644	668	C
Male adult	589	710	0.2457	668	C
Male adult	606	719	0.3413	668	C
Male adult	606	716	0.4232	668	C
Male adult	243	427	0.041	345	D
Male adult	592	719	0.2184	668	C
Male adult	667	745	0.2457	711	C
Male adult	592	706	0.5595	646	C
Male adult	605	726	0.5833	668	C
Male adult	585	733	0.3929	668	C
Male adult	609	731	0.131	668	C
Male adult	417	533	0.0357	495	D
Male adult	996	2226	0.1402	1077	D
Male adult	699	5936	0.397	711	I
Male adult	579	706	0.3059	668	C
Male adult	232	374	0.2262	323	C
Male adult	1201	1416	0.0765	1357	D
Male adult	1105	2251	0.2931	1594	E
Female suadult	2367	2731	0.1402	2433	A
Female suadult	1133	1314	0.0765	1227	D
Female suadult	502	796	0.0892	581	G
Female suadult	1233	1400	0.0765	1357	D
Female suadult	1574	1705	0.0127	1637	D
Female suadult	375	526	0.0956	474	C
Female suadult	578	681	0.041	646	D
Female suadult	463	614	0.0137	581	D
Female suadult	996	1296	0.1911	1249	D
Female suadult	251	370	0.1365	323	C
Female suadult	859	1084	0.1092	991	D
Female suadult	661	780	0.041	732	D
Female suadult	1194	1382	0.2048	1378	D
Female suadult	3531	4095	0.2867	3833	A
Female suadult	3019	3465	0.1775	3316	A
Female suadult	263	378	0.0273	345	F
Female suadult	991	1106	0.023	1055	F
Female suadult	1963	2081	0.1365	2046	C
Female suadult	3057	3274	0.1229	3230	A
Female suadult	287	445	0.1502	388	C
Female suadult	231	363	0.0737	302	F
Female suadult	145	1163	0.1032	151	G
Female suadult	553	660	0.1916	625	C
Female suadult	312	428	0.2381	388	C
Female suadult	185	312	0.0357	280	D
Female suadult	1195	1349	0.0952	1292	D
Female suadult	707	861	0.0238	797	D
Female suadult	206	360	0.3571	302	C
Female suadult	1949	2232	0.5833	2024	C
Female suadult	578	810	0.0238	732	D
Female suadult	231	360	0.2024	237	C
Female suadult	268	376	0.1905	323	C
Female suadult	2062	2170	0.0357	2132	D
Female suadult	3409	3863	0.119	3553	A
Female suadult	257	483	0.314	388	C
Female suadult	438	580	0.1911	538	C
Female suadult	438	589	0.041	495	D
Female suadult	423	559	0.0273	474	D
Female suadult	440	544	0.0546	517	D
Female suadult	224	331	0.1638	280	C
Female suadult	438	555	0.2048	495	C
Female suadult	406	566	0.0273	517	D
Female suadult	423	559	0.0273	517	D
Female suadult	1688	2024	0.2048	1960	A
Female suadult	431	545	0.0273	517	F
Female suadult	466	552	0.0546	517	F
Female suadult	416	589	0.0273	517	F
Female suadult	978	1204	0.0546	1077	D
Female suadult	440	540	0.0273	495	D
Female suadult	1782	1972	0.0956	1917	D
Female suadult	3161	3748	0.041	3618	B
Female suadult	449	587	0.4505	517	C
Female suadult	438	598	0.5733	538	C
Female suadult	1651	2263	0.4368	1917	A
Female suadult	440	601	0.1638	495	C
Female suadult	418	590	0.0956	517	C
Female suadult	429	590	0.1229	517	C
Female suadult	440	579	0.1229	517	C
Female suadult	375	579	0.041	495	D
Female suadult	429	601	0.0819	495	D
Female suadult	397	601	0.1365	538	C
Female suadult	440	547	0.1229	517	C
Female suadult	440	643	0.0546	603	D
Female suadult	236	418	0.0819	237	C
Female suadult	418	579	0.0273	538	D
Female suadult	444	574	0.3452	517	C
Female suadult	410	604	0.1786	538	D
Female suadult	408	574	0.4524	517	D
Female suadult	378	604	0.369	538	D
Female suadult	211	332	0.1667	280	D
Female suadult	419	574	0.119	517	G
Female suadult	214	330	0.119	280	D
Female suadult	300	483	0.0476	409	D
Female suadult	219	363	0.1786	280	D
Female suadult	152	241	0.1071	194	D
Female suadult	433	556	0.0637	495	C
Female suadult	437	557	0.0637	517	C
Female suadult	202	327	0.1147	280	C
Female suadult	431	544	0.1147	517	C
Female suadult	413	574	0.1147	517	C
Female suadult	453	649	0.051	560	C
Female suadult	453	589	0.1784	517	C
Female suadult	448	564	0.0765	517	C
Female suadult	603	720	0.6627	668	C
Female suadult	785	1153	0.7901	991	C
Female suadult	1619	1776	0.0637	1701	D
Female suadult	560	754	0.0238	668	D
Female suadult	415	598	0.0595	517	C
Female suadult	448	581	0.2143	517	C
Female suadult	183	365	0.0476	302	D
Female suadult	415	581	0.2738	517	C
Female suadult	440	589	0.0357	517	C
Female suadult	332	438	0.1429	345	C
Female suadult	438	589	0.0833	517	C
Female suadult	287	438	0.0595	366	C
Female suadult	317	437	0.0833	431	C
Female suadult	1433	1750	0.1667	1658	A
Female suadult	2380	3001	0.0952	2885	A
Female suadult	246	418	0.0595	388	C
Female suadult	315	446	0.0637	366	C
Female suadult	609	713	0.2166	668	C
Female suadult	466	571	0.051	517	D
Female suadult	815	1313	0.2549	883	H
Female suadult	303	785	0.102	409	I
Female suadult	417	599	0.2381	495	C
Female suadult	438	602	0.0595	538	C
Female suadult	460	632	0.0357	538	C
Female suadult	315	980	0.0595	818	D
Female suadult	460	573	0.0595	517	C
Female suadult	423	604	0.1071	517	C
Female suadult	1678	1815	0.0833	1744	D
Male subadult	3187	3420	0.0473	3295	A
Male subadult	599	686	0.221	646	C
Male subadult	205	365	0.2804	302	C
Male subadult	8826	9873	0.1912	9216	A
Male subadult	8736	9044	0.051	8979	A
Male subadult	640	742	0.4588	711	C
Male subadult	3588	4590	0.3059	3725	C
Male subadult	3816	4157	0.1147	4113	C
Male subadult	2215	2571	0.1912	2283	D
Male subadult	12128	12699	0.102	12339	A
Male subadult	854	1021	0.051	948	G
Male subadult	589	720	0.6006	668	C
Male subadult	575	708	0.0892	646	D
Male subadult	593	721	0.1529	668	C
Male subadult	5525	5942	0.051	5857	A
Male subadult	613	731	0.3823	668	C
Male subadult	613	724	0.3059	668	C
Male subadult	204	314	0.051	258	D
Male subadult	2163	2291	0.3186	2240	C
Male subadult	873	1017	0.0637	904	D
Male subadult	694	874	0.1402	797	C
Male subadult	1377	2223	0.2143	1658	A
Male subadult	963	1105	0.1071	1055	G
Male subadult	565	707	0.0952	646	C
Male subadult	1079	1246	0.0357	1184	D
Male subadult	900	1722	0.0833	1184	G
Male subadult	1054	1167	0.0476	1120	D
Male subadult	8618	9387	0.0595	8872	A
Male subadult	273	427	0.0952	345	D
Male subadult	8900	9123	0.0476	9022	A
Male subadult	578	695	0.1071	668	C
Male subadult	977	1195	0.0714	1098	G
Male subadult	565	668	0.119	646	C
Male subadult	565	694	0.369	646	C
Male subadult	591	694	0.4048	646	C
Male subadult	450	604	0.0476	538	D
Male subadult	540	732	0.1071	646	D
Male subadult	625	732	0.1548	711	C
Male subadult	242	436	0.0952	366	D
Male subadult	423	572	0.0476	495	D
Male subadult	1033	1269	0.1429	1120	D
Male subadult	1318	1605	0.0119	1464	F
Male subadult	1678	1851	0.0357	1723	D
Male subadult	1432	1621	0.0595	1486	D
Male subadult	8736	8955	0.0357	8807	A
Male subadult	8894	9136	0.0714	8958	A
Male subadult	347	490	0.2024	388	F
Male subadult	10687	10920	0.0382	10831	A
Male subadult	9412	10001	0.1274	9733	A
Male subadult	11236	11414	0.051	11348	A
Male subadult	8734	9121	0.0255	8936	A
Male subadult	606	729	0.0892	711	D
Male subadult	10489	10818	0.036	10616	B
Male subadult	585	685	0.548	646	C
Male subadult	618	770	0.1147	711	D
Male subadult	8310	8728	0.1402	8699	A
Male subadult	8686	9252	0.102	9066	A
Male subadult	8892	9368	0.051	9022	A
Male subadult	565	694	0.5862	646	C
Male subadult	617	758	0.1912	689	C
Male subadult	925	1169	0.0765	1034	D
Male subadult	8861	9581	0.1912	9302	A
Male subadult	529	651	0.0127	581	D
Male subadult	565	720	0.0255	646	D
Male subadult	9582	9758	0.0637	9690	A
Male subadult	9654	9790	0.0127	9712	A
Male subadult	837	1202	0.051	948	D
Male subadult	8409	9654	0.1147	9238	A
Male subadult	966	1120	0.7519	1077	C
Male subadult	1234	1568	0.0884	1400	D
Male subadult	10549	10733	0.0295	10659	B
Male subadult	8166	8433	0.1327	8376	A
Male subadult	8535	9902	0.1032	9690	A
Male subadult	8836	8977	0.0442	8915	A
Male subadult	193	313	0.4274	258	C
Male subadult	643	743	0.2506	711	C
Male subadult	8571	8907	0.059	8743	A
Male subadult	9646	10083	0.0714	10013	A
Male subadult	10801	12396	0.2976	10896	A
Male subadult	10567	11838	0.2857	10896	A
Male subadult	9581	9795	0.0238	9712	A
Male subadult	947	1116	0.0357	1055	D
Male subadult	960	1128	0.0238	1034	D
Male subadult	9150	10508	0.0833	9862	A
Male subadult	8669	10174	0.1548	9410	A
Male subadult	11021	12429	0.1071	11628	A
Male subadult	12632	13423	0.3095	13006	A
Male subadult	1375	1595	0.0952	1507	D
Male subadult	7815	9464	0.0952	8915	A
Male subadult	9710	10364	0.0476	9884	A
Male subadult	933	1116	0.0357	1034	D
Male subadult	951	1090	0.0357	1034	D
Male subadult	525	668	0.0238	603	D
Male subadult	11621	11924	0.0476	11843	A
Male subadult	10708	11582	0.0833	11327	A
Male subadult	12524	12644	0.0357	12597	A
Male subadult	10570	11057	0.1667	10788	A
Male subadult	9847	10956	0.1548	9927	A
Male subadult	6077	6495	0.0952	6352	A
Male subadult	10612	11223	0.0952	11111	A
Male subadult	11238	12362	0.1548	11843	A
Male subadult	8506	9390	0.1667	9022	A
Male subadult	608	748	0.1071	689	D
Male subadult	10589	10943	0.0714	10702	A
Male subadult	283	411	0.2804	345	C
Male subadult	8410	9742	0.1147	9582	A
Male subadult	900	1208	0.0255	1012	G
Male subadult	283	424	0.0892	388	D
Male subadult	257	373	0.2549	323	C
Male subadult	10575	10982	0.0637	10853	A
Male subadult	199	283	0.0765	215	D
Mixed-sex group	4781	5393	0.0595	5297	A
Mixed-sex group	4688	5115	0.6071	4931	E
Mixed-sex group	320	470	0.4048	409	C
Mixed-sex group	604	722	0.6548	668	C
Mixed-sex group	437	1664	0.2857	1271	E
Mixed-sex group	1120	1279	0.131	1206	C
Mixed-sex group	1321	1443	0.0952	1400	C
Mixed-sex group	462	1739	0.369	1249	E
Mixed-sex group	840	1666	0.3571	1227	E
Mixed-sex group	395	1837	0.5238	1120	E
Mixed-sex group	363	2809	0.5357	1141	E
Mixed-sex group	235	1324	0.619	237	E
Mixed-sex group	555	5796	0.5833	1529	E
Mixed-sex group	443	1359	0.5833	904	E
Mixed-sex group	421	5847	0.6071	1163	E
Mixed-sex group	421	4467	0.7976	948	E
Mixed-sex group	253	5941	0.381	1292	E
Mixed-sex group	485	1391	0.631	926	E
Mixed-sex group	506	1285	0.2024	517	E
Mixed-sex group	225	429	0.2262	345	C
Mixed-sex group	566	726	0.619	668	C
Mixed-sex group	598	737	0.7857	668	C
Mixed-sex group	251	370	0.2024	345	C
Mixed-sex group	256	427	0.1548	366	C
Mixed-sex group	587	1762	0.6429	1120	E
Mixed-sex group	609	8147	0.5238	5642	E
Mixed-sex group	128	5863	0.4643	129	E
Mixed-sex group	159	2748	0.6905	991	E
Mixed-sex group	185	5418	0.881	883	E
Mixed-sex group	185	2643	0.7024	1012	E
Mixed-sex group	211	2431	0.8095	840	E
Mixed-sex group	185	3383	0.619	302	E
Mixed-sex group	224	342	1.2107	280	C
Mixed-sex group	682	812	0.1147	754	C
Mixed-sex group	587	716	0.1529	668	C
Mixed-sex group	1628	1880	0.2166	1809	A
Mixed-sex group	4970	5692	0.1147	5362	A
Mixed-sex group	5230	5617	0.0892	5513	A
Mixed-sex group	195	6196	0.548	215	E
Mixed-sex group	227	4158	0.6882	237	E
Mixed-sex group	130	6724	0.7519	151	E
Mixed-sex group	195	2501	0.8538	904	E
Mixed-sex group	292	1722	0.7519	861	E
Mixed-sex group	260	1202	0.7264	969	E
Mixed-sex group	5261	7765	0.5595	5620	E
Mixed-sex group	5395	5902	0.4167	5706	E
Mixed-sex group	491	630	0.0952	560	C
Mixed-sex group	254	2599	0.5119	861	E
Mixed-sex group	385	619	0.0595	517	F
Mixed-sex group	815	1367	0.0119	1098	F
Mixed-sex group	275	5134	0.75	5125	E
Mixed-sex group	317	3127	0.631	904	E
Mixed-sex group	148	5213	0.7857	151	E
Mixed-sex group	311	3372	0.7143	883	E
Mixed-sex group	383	1602	0.75	904	E
Mixed-sex group	335	3324	0.6429	926	E
Mixed-sex group	430	1554	0.4524	818	E
Mixed-sex group	383	2559	0.381	904	E
Mixed-sex group	1148	1541	0.238	1378	E
Mixed-sex group	1208	1510	0.238	1378	E
Mixed-sex group	1027	1692	0.6676	1464	E
Mixed-sex group	5920	6192	0.5515	5943	C
Mixed-sex group	605	1679	0.6444	1292	E
Mixed-sex group	711	1769	0.4238	1292	E
Mixed-sex group	1719	2627	0.4188	2067	E
Mixed-sex group	374	502	0.3527	474	C
Mixed-sex group	4848	5430	0.0309	5082	A
Mixed-sex group	235	6942	0.4941	302	E
Mixed-sex group	235	374	0.4015	302	C
Mixed-sex group	235	363	0.3706	258	C
Mixed-sex group	4777	5286	0.5971	4910	E
Mixed-sex group	4760	6872	0.1235	5728	E
Mixed-sex group	4734	6667	0.7618	6374	E
Mixed-sex group	555	673	0.2059	603	C
Mixed-sex group	587	684	0.1853	646	C
Mixed-sex group	332	2395	0.7412	948	E
Mixed-sex group	308	6734	0.803	4910	E
Mixed-sex group	332	2537	0.8545	861	E
Mixed-sex group	332	5358	0.8442	5082	E
Mixed-sex group	379	3628	0.8442	948	E
Mixed-sex group	99	214	0.4	108	C
Mixed-sex group	203	2585	0.5	215	E
Mixed-sex group	334	1709	0.6	388	E
Mixed-sex group	513	657	0.3	603	C
Mixed-sex group	5244	6734	0.1	6266	A
Mixed-sex group	1164	1559	0.5	1421	E
Mixed-sex group	1089	1517	0.5	1400	E
Mixed-sex group	1004	1272	0.1	1098	E
Mixed-sex group	1105	1595	0.3	1184	E
Mixed-sex group	271	6941	0.8	754	E
Mixed-sex group	313	2626	0.8	323	E
Mixed-sex group	334	5816	0.8	689	E
Mixed-sex group	396	2543	0.9	926	E
Mixed-sex group	1126	1688	0.6	1486	E
Mixed-sex group	771	1438	0.4	1271	E
Mixed-sex group	959	1636	0.5	1206	E
Mixed-sex group	299	1578	0.3095	302	E
Mixed-sex group	567	781	0.119	689	G
Mixed-sex group	2145	2295	0.0714	2218	D
Mixed-sex group	301	2978	0.7262	1077	E
Mixed-sex group	351	5264	0.9405	409	E
Mixed-sex group	351	1479	0.8214	969	E
Mixed-sex group	301	5389	0.7738	302	E
Mixed-sex group	401	1379	0.7857	732	E
Mixed-sex group	171	1742	0.1429	991	E
Mixed-sex group	442	591	0.0476	495	D
Mixed-sex group	555	716	0.0476	625	D
Mixed-sex group	317	4012	0.6071	323	E
Mixed-sex group	246	7374	0.4881	1249	E
Mixed-sex group	299	3766	0.5952	1012	E
Mixed-sex group	264	6582	0.619	1227	E
Mixed-sex group	422	1390	0.3214	732	E
Mixed-sex group	634	1707	0.4048	1400	E
Mixed-sex group	616	1320	0.4048	775	E
Mixed-sex group	792	1320	0.2738	904	E
Mixed-sex group	256	5168	0.5614	258	E
Mixed-sex group	5232	5602	0.4188	5340	A
Mixed-sex group	564	2469	0.6595	818	E
Mixed-sex group	160	7197	0.3095	840	E
Mixed-sex group	6192	8915	0.0952	8420	A
Mixed-sex group	1038	1151	0.3831	1120	C
Mixed-sex group	1038	1153	0.4412	1120	C
Mixed-sex group	598	716	0.4412	689	C
Mixed-sex group	275	398	0.1045	345	D
Mixed-sex group	246	374	0.8095	258	C
Mixed-sex group	394	1488	0.4286	969	E
Mixed-sex group	233	1633	0.5357	366	E
Mixed-sex group	357	1570	0.2976	969	E
Mixed-sex group	726	1050	0.2976	926	E
Mixed-sex group	583	705	0.1429	668	C
Mixed-sex group	186	6249	0.5	754	E
Mixed-sex group	309	2475	0.5833	883	E
Mixed-sex group	248	5465	0.631	861	E
Mixed-sex group	227	2557	0.5	1055	E
Mixed-sex group	780	1087	0.2738	926	E
Mixed-sex group	890	1334	0.1071	1012	E
Mixed-sex group	846	1298	0.2143	969	E
Mixed-sex group	7996	8251	0.0127	8204	B
Mixed-sex group	4828	5266	0.3951	4974	E
Mixed-sex group	1338	5236	0.1402	1701	H
Mixed-sex group	576	683	0.2294	646	C
Mixed-sex group	416	1447	0.3568	1206	E
Mixed-sex group	407	1529	0.2804	840	E
Mixed-sex group	585	699	0.2294	646	C
Mixed-sex group	504	1447	0.4588	969	E
Mixed-sex group	6194	6482	0.131	6417	A
Mixed-sex group	630	1378	0.2976	1077	E
Mixed-sex group	374	1666	0.3095	840	E
Mixed-sex group	267	1613	0.3214	1034	E
Mixed-sex group	673	1484	0.2738	840	E
Mixed-sex group	449	1527	0.2619	797	E
Mixed-sex group	181	334	0.1667	237	C
Mixed-sex group	192	331	0.3095	194	C
Mixed-sex group	6341	6752	0.0238	6654	B
Mixed-sex group	237	369	0.3452	302	C
Mixed-sex group	182	348	0.0476	280	C
Mixed-sex group	983	1419	0.2314	1077	H
Mixed-sex group	1449	1730	0.0882	1637	H
Mixed-sex group	203	355	0.1102	302	C
Mixed-sex group	173	661	0.3333	280	C
Mixed-sex group	397	1444	0.5952	775	E
Mixed-sex group	203	346	0.2857	258	C
Mixed-sex group	173	285	0.2262	215	C
Mixed-sex group	256	417	0.1429	345	C
Mixed-sex group	875	2156	0.1905	1034	H
Mixed-sex group	264	407	0.5833	345	C
Mixed-sex group	330	463	0.1657	388	C
Mixed-sex group	351	459	0.2166	388	C
Mixed-sex group	316	459	0.3951	388	C
Mixed-sex group	278	449	0.1402	366	C
Mixed-sex group	330	427	0.1784	409	C
Mixed-sex group	140	259	0.6499	215	C
Mixed-sex group	119	210	0.3823	129	C
Mixed-sex group	252	1409	0.1147	345	H
Mixed-sex group	352	513	0.3313	409	C
Mixed-sex group	238	939	0.3441	323	H
Mixed-sex group	777	2246	0.2094	991	H
Mixed-sex group	758	5557	0.0882	4565	J
Mixed-sex group	261	418	0.5595	366	C
Mixed-sex group	584	1483	0.369	1163	E
Mixed-sex group	444	7840	0.4167	1400	E
Mixed-sex group	983	1107	0.1548	1055	C
Mixed-sex group	611	743	0.4881	625	C
Mixed-sex group	306	1321	0.2976	991	E
Mixed-sex group	719	1561	0.3452	904	E
Mixed-sex group	3667	3913	0.2024	3833	A
Mixed-sex group	3994	4286	0.1071	4134	A
Mixed-sex group	526	4029	0.5238	1163	E
Mixed-sex group	397	7451	0.5952	1184	E
Mixed-sex group	322	1511	0.4881	431	E
Mixed-sex group	347	1536	0.5119	689	E
